# Supplementary material for: Decrease of FSTL1-BMP4-Smad signaling predicts poor prognosis in lung adenocarcinoma but not in squamous cell carcinoma
Source: PubMed Central journal article supplement (PMC5575295; doi:10.1038/s41598-017-10366-2), 2017-08-29

## **Decrease of FSTL1-BMP4-Smad signaling predicts poor prognosis in lung adenocarcinoma but not in squamous cell carcinoma**

Jean Chiou<sup>1,2</sup>, Chia-Yi Su<sup>3</sup>, Yi-Hua Jan<sup>2</sup>, Chih-Jen Yang<sup>4</sup>, Ming-Shyan Huang<sup>4</sup>, Yung-Luen Yu<sup>1,5\*</sup>,  
Michael Hsiao<sup>2,5,6\*</sup>

<sup>1</sup>The PhD. Program for Cancer Biology and Drug Discovery, China Medical University, Taichung, Taiwan, <sup>2</sup>Genomics Research Center, Academia Sinica, Taipei, Taiwan, <sup>3</sup>Graduate Institute of Bioengineering, University of Washington, Seattle, WA, USA, <sup>4</sup>Department of Internal Medicine, Kaohsiung Medical University Hospital, Kaohsiung Medical University, Kaohsiung, Taiwan, <sup>5</sup>Graduate Institute of Cancer Biology and Center for Molecular Medicine, China Medical University, Taichung, Taiwan, <sup>6</sup>Department of Biochemistry, College of Medicine, Kaohsiung Medical University, Kaohsiung, Taiwan

\*Correspondence to Dr. Michael Hsiao, Genomics Research Center, Academia Sinica, Taipei, Taiwan. Tel: +886-2-2787-1243; Fax: +886-2-2789-9931; E-mail: [mhsiao@gate.sinica.edu.tw](mailto:mhsiao@gate.sinica.edu.tw)  
Or to Dr. Yung-Luen Yu, Graduate Institute of Cancer Biology and Center for Molecular Medicine, China Medical University, Taichung, Taiwan. Tel: +886-4-22053366; E-mail: [ylyu@mail.cmu.edu.tw](mailto:ylyu@mail.cmu.edu.tw)

**Supplementary Table 1**

| Clinicopathological features | n  | FSTL1 expression, n (%) |             | P     | BMP4 expression, n (%) |             | P     | Smad4 expression, n (%) |             | P      | pSmad158 expression, n (%) |             | P     |
|------------------------------|----|-------------------------|-------------|-------|------------------------|-------------|-------|-------------------------|-------------|--------|----------------------------|-------------|-------|
|                              |    | Low (n=32)              | High (n=26) |       | Low (n=36)             | High (n=22) |       | Low (n=42)              | High (n=16) |        | Low (n=36)                 | High (n=22) |       |
| Age                          |    |                         |             |       |                        |             |       |                         |             |        |                            |             |       |
| <65 y                        | 35 | 19 (54.3)               | 16 (45.7)   | 0.867 | 24 (68.6)              | 11 (31.4)   | 0.208 | 27 (77.1)               | 8 (22.9)    | 0.320  | 12 (34.3)                  | 23 (65.7)   | 0.760 |
| ≥65 y                        | 23 | 13 (56.5)               | 10 (43.5)   |       | 12 (52.2)              | 11 (47.8)   |       | 15 (65.2)               | 8 (34.8)    |        | 7 (30.4)                   | 16 (69.6)   |       |
| Gender                       |    |                         |             |       |                        |             |       |                         |             |        |                            |             |       |
| Male                         | 27 | 11 (40.7)               | 16 (59.3)   | 0.039 | 13 (48.1)              | 14 (51.9)   | 0.041 | 17 (63.0)               | 10 (37.0)   | 0.133  | 9 (33.3)                   | 18 (66.7)   | 0.931 |
| Female                       | 31 | 21 (67.7)               | 10 (32.3)   |       | 23 (74.2)              | 8 (25.8)    |       | 25 (80.6)               | 6 (19.4)    |        | 10 (32.3)                  | 21 (67.7)   |       |
| Smoking                      |    |                         |             |       |                        |             |       |                         |             |        |                            |             |       |
| Non-smoker                   | 32 | 13 (40.6)               | 19 (59.4)   | 0.013 | 16 (50.0)              | 16 (50.0)   | 0.036 | 17 (53.1)               | 15 (46.9)   | <0.001 | 8 (25.0)                   | 24 (75.0)   | 0.163 |
| Smoker                       | 26 | 19 (73.1)               | 7 (26.9)    |       | 20 (76.9)              | 6 (23.1)    |       | 25 (96.2)               | 1 (3.8)     |        | 11 (42.3)                  | 15 (57.7)   |       |
| T status                     |    |                         |             |       |                        |             |       |                         |             |        |                            |             |       |
| T1+T2                        | 39 | 21 (53.8)               | 18 (46.2)   | 0.771 | 21 (53.8)              | 18 (46.2)   | 0.064 | 26 (66.7)               | 13 (33.3)   | 0.161  | 9 (23.1)                   | 30 (76.9)   | 0.024 |
| T3+T4                        | 19 | 11 (57.9)               | 8 (42.1)    |       | 15 (78.9)              | 4 (21.1)    |       | 16 (84.2)               | 3 (15.8)    |        | 10 (52.6)                  | 9 (47.4)    |       |
| N status                     |    |                         |             |       |                        |             |       |                         |             |        |                            |             |       |
| N0                           | 22 | 13 (59.1)               | 9 (40.9)    | 0.639 | 15 (68.2)              | 7 (31.8)    | 0.453 | 17 (77.3)               | 5 (22.7)    | 0.517  | 8 (36.4)                   | 14 (63.6)   | 0.647 |
| N1-N3                        | 36 | 19 (52.8)               | 17 (47.2)   |       | 21 (58.3)              | 15 (41.7)   |       | 25 (69.4)               | 11 (30.6)   |        | 11 (30.6)                  | 25 (69.4)   |       |
| M status                     |    |                         |             |       |                        |             |       |                         |             |        |                            |             |       |
| M0                           | 44 | 22 (50.0)               | 22 (50.0)   | 0.160 | 26 (59.1)              | 18 (40.9)   | 0.407 | 30 (68.2)               | 14 (31.8)   | 0.201  | 16 (36.4)                  | 28 (63.6)   | 0.300 |
| M1                           | 14 | 10 (71.4)               | 4 (28.6)    |       | 10 (71.4)              | 4 (28.6)    |       | 12 (85.7)               | 2 (14.3)    |        | 3 (21.4)                   | 11 (78.6)   |       |
| Pathological stage           |    |                         |             |       |                        |             |       |                         |             |        |                            |             |       |
| I + II                       | 22 | 9 (40.9)                | 13 (59.1)   | 0.088 | 12 (54.5)              | 10 (45.5)   | 0.356 | 14 (63.6)               | 8 (36.4)    | 0.242  | 6 (27.3)                   | 16 (72.7)   | 0.486 |
| III + IV                     | 36 | 23 (63.9)               | 13 (36.1)   |       | 24 (66.7)              | 12 (33.3)   |       | 28 (77.8)               | 8 (22.2)    |        | 13 (36.1)                  | 23 (63.9)   |       |
| Recurrence                   |    |                         |             |       |                        |             |       |                         |             |        |                            |             |       |
| No                           | 35 | 19 (54.3)               | 16 (45.7)   | 0.867 | 21 (60.0)              | 14 (40.0)   | 0.689 | 25 (71.4)               | 10 (28.6)   | 0.836  | 10 (28.6)                  | 25 (71.4)   | 0.402 |
| Yes                          | 23 | 13 (56.5)               | 10 (43.5)   |       | 15 (65.2)              | 8 (34.8)    |       | 17 (73.9)               | 6 (26.1)    |        | 9 (39.1)                   | 14 (60.9)   |       |

## Supplementary Figure legends

**Supplementary Figure 1.** (A) In public TCGA dataset, significant correlations are seen between FSTL1 and BMP4 RNA level and between FSTL1 and Smad4 RNA level. *P* value was obtained from Pearson correlation analysis. (B) Lung adenocarcinoma with ALK-fusion or KRAS-mutation has more frequent low FSTL1 RNA expression compared to EGFR mutant or EGFR/KRAS/ALK-negative tumor. *P* value was obtained from Pearson correlation analysis.

**Supplementary Figure 2.** FSTL1 recombinant protein inhibited nicotine-induced proliferation in SK-LU-1 but not in H2171 cells. (A) FSTL1 recombinant protein inhibited nicotine-induced proliferation in SK-LU-1 cells (lung adenocarcinoma cell line) proliferation with a dose-dependent manner. Error bar: SD. (B) H2171 cell line did not respond to nicotine and FSTL1 treatment. Error bar: SD. *P* value was obtained from Student's t-test analysis.

**Supplementary Figure 3.** FSTL1 inhibits nicotine-induced cell proliferation by ERK signal pathway. (A) Extracellular FSTL1 expression level were downregulated by nicotine (1 $\mu$ M) with a time-dependent manner. FSTL1 level was assayed by ELISA. Error bar: SD. \*: *P*<0.05. \*\*: *P*<0.01. *P* value was obtained from Student's t-test analysis. (B) PD98059 was pre-treated for 30 minutes before nicotine treatment (6hr). PD98059 prevented p-ERK induction after nicotine treatment. ERK referred to the loading controls. (C) PD98059 (50 $\mu$ M) inhibits nicotine-induced FSTL1 decreasing. PD98059 was pre-treated for 30 minutes before nicotine treatment (6hr). Extracellular FSTL1 expression level were assayed by ELISA. Error bar: SD. \*: *P*<0.05. *P* value was obtained from Student's t-test analysis. (E) PD98059 inhibited nicotine-induced Beas2B (normal human bronchial epithelial cell) proliferation with

a dose dependent manner. Error bar: SD. \*:  $P < 0.05$ . \*\*:  $P < 0.01$ .  $P$  value was obtained from Student's t-test analysis.

# Supplementary Figure 1

## A

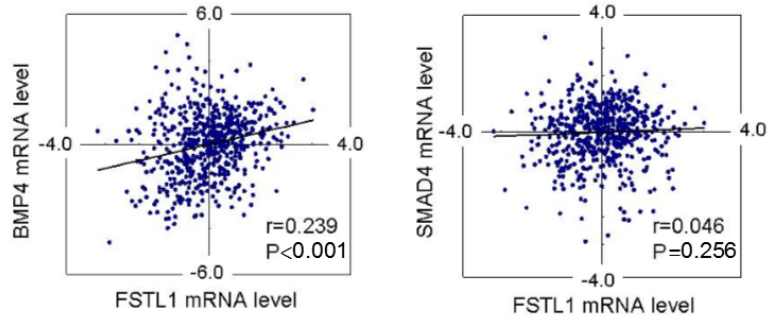

## B

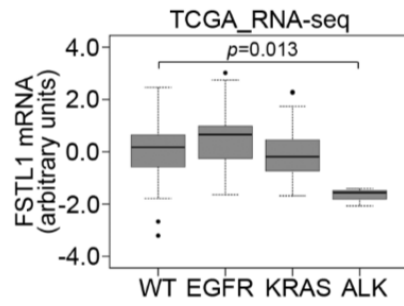

# Supplementary Figure 2

## A

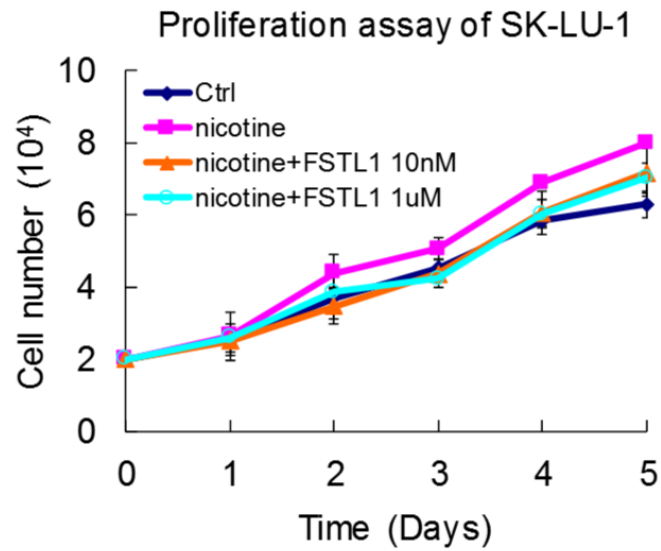

## B

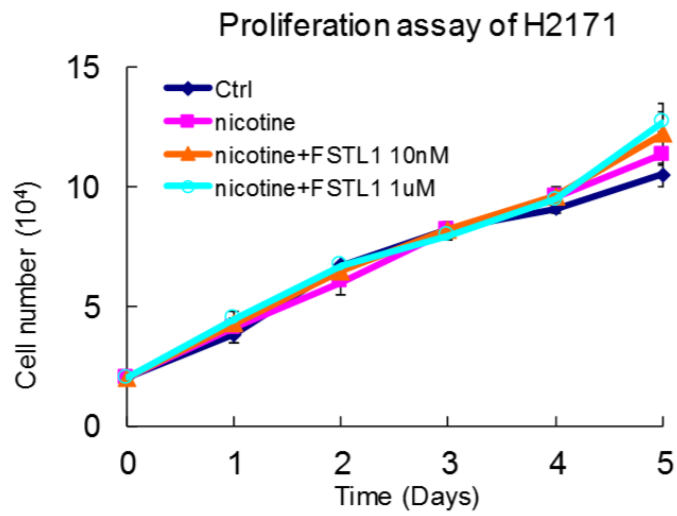

# Supplementary Figure 3

**A**

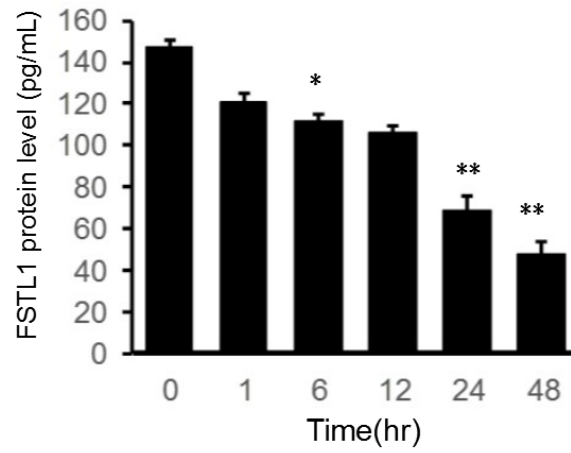

**B**

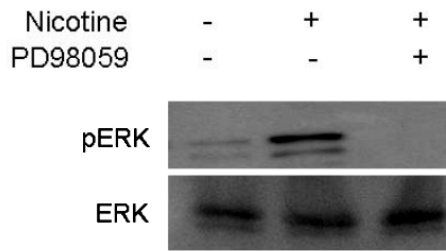

**C**

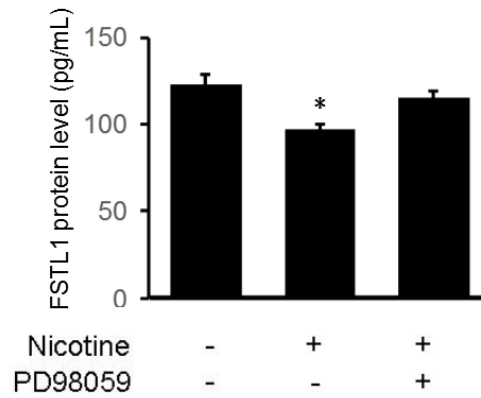

**D**

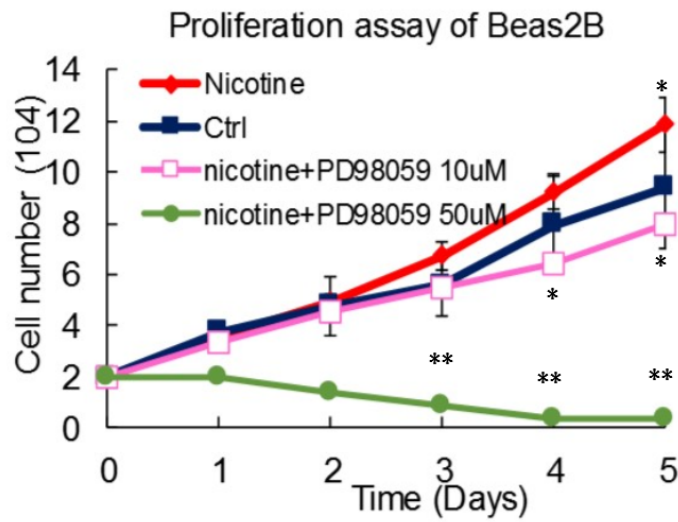

## Original Raw Images Information

Figure 3(a): Full length Western blot images were taken by LAS-4000 Luminescent Image Analyzer

Figure 3(b) (left): Full length Western blot images were taken by X-ray films

Figure 3(b) (right): Full length Western blot images were taken by X-ray films.

Figure 3 (a)

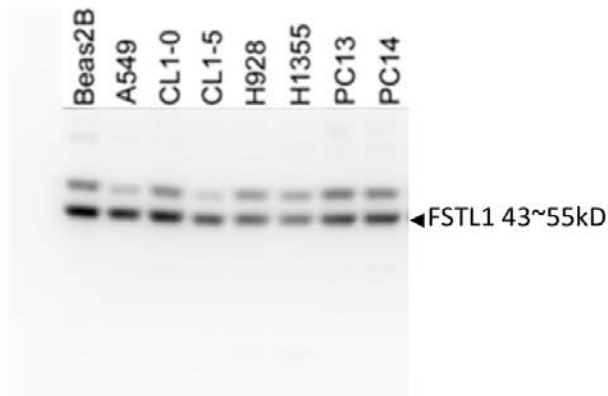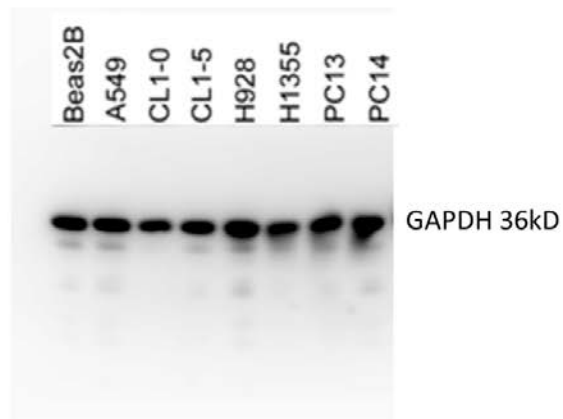

Figure 3 (b)

(Left)

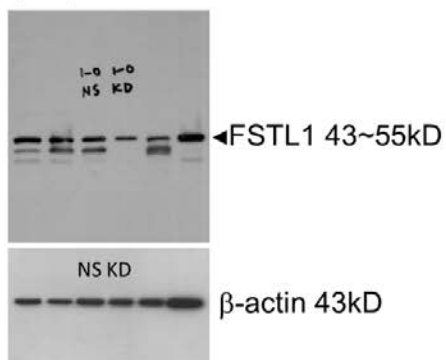

(Right)

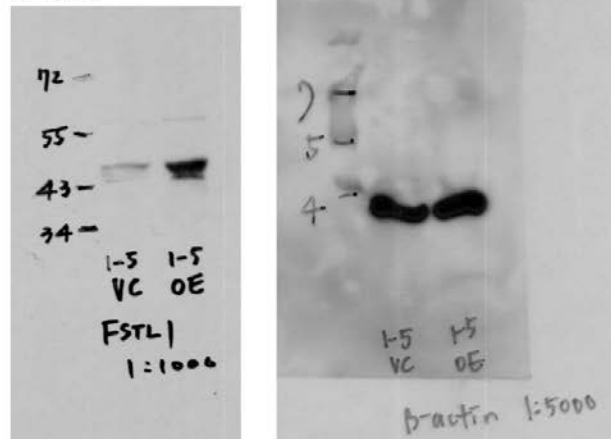

Supplement: 41598_2017_10366_MOESM1_ESM.pdf [file 41598_2017_10366_MOESM1_ESM.pdf]
